# Supplementary figures and images for: Activation of hedgehog signaling in mesenchymal stem cells induces cartilage and bone tumor formation via Wnt/β-Catenin
Source: eLife journal article supplement (doi:10.7554/elife.50208), 2019-09-04

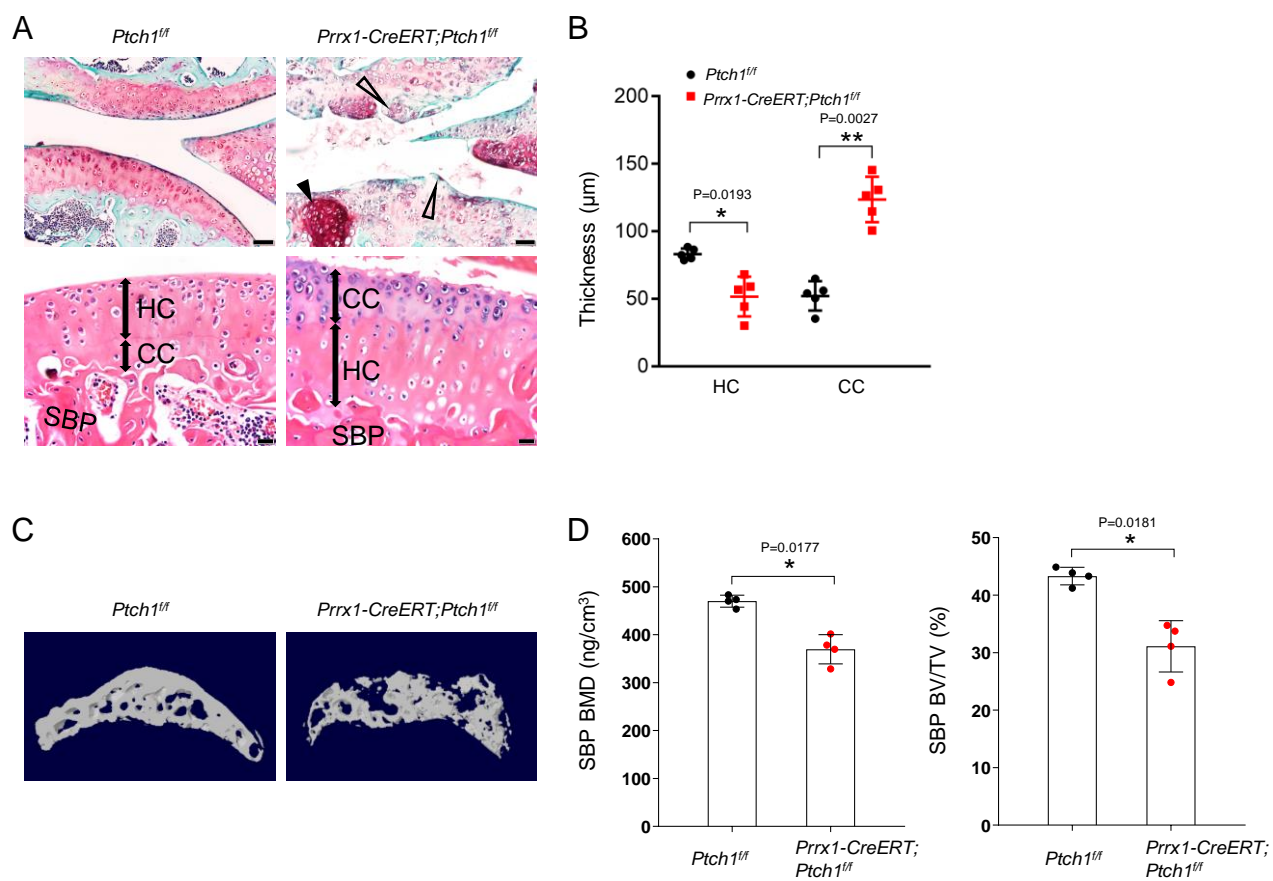

Figure 2-figure supplement 1

Supplement: supp [file elife_poa_e50208_Figure_2_figure_supplement_1.pdf › elife_poa_e50208_Figure_2_figure_supplement_1.pdf]

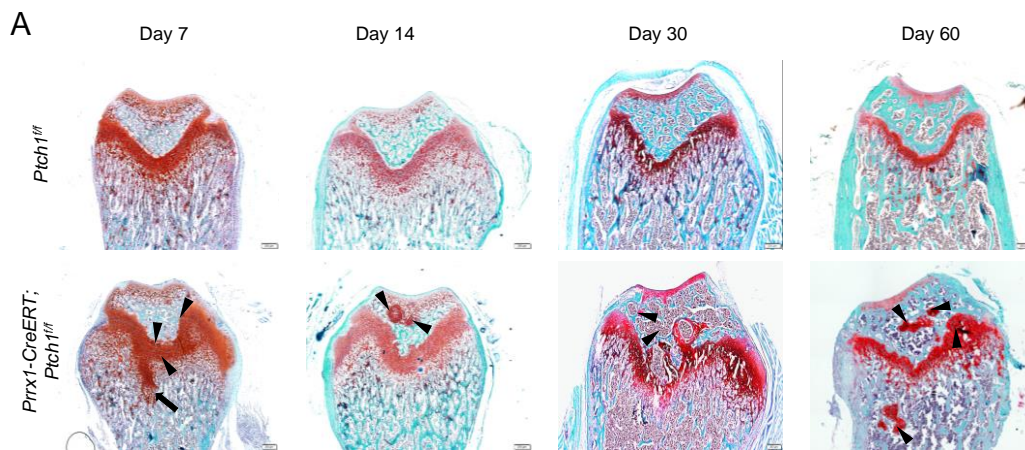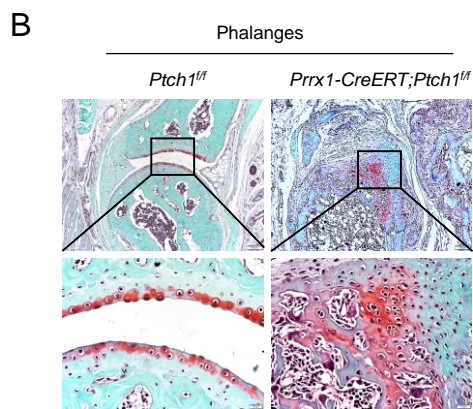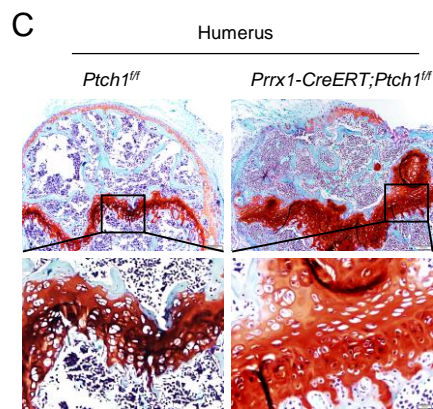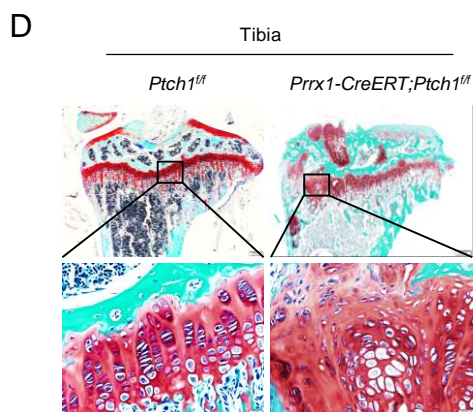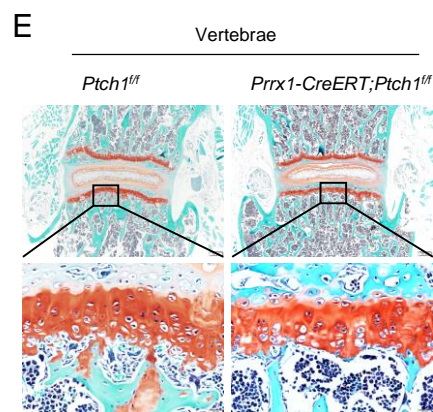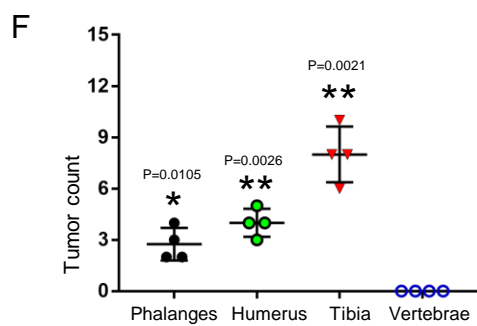

Figure 2-figure supplement 2

Supplement: supp [file elife_poa_e50208_Figure_2_figure_supplement_2.pdf › elife_poa_e50208_Figure_2_figure_supplement_2.pdf]

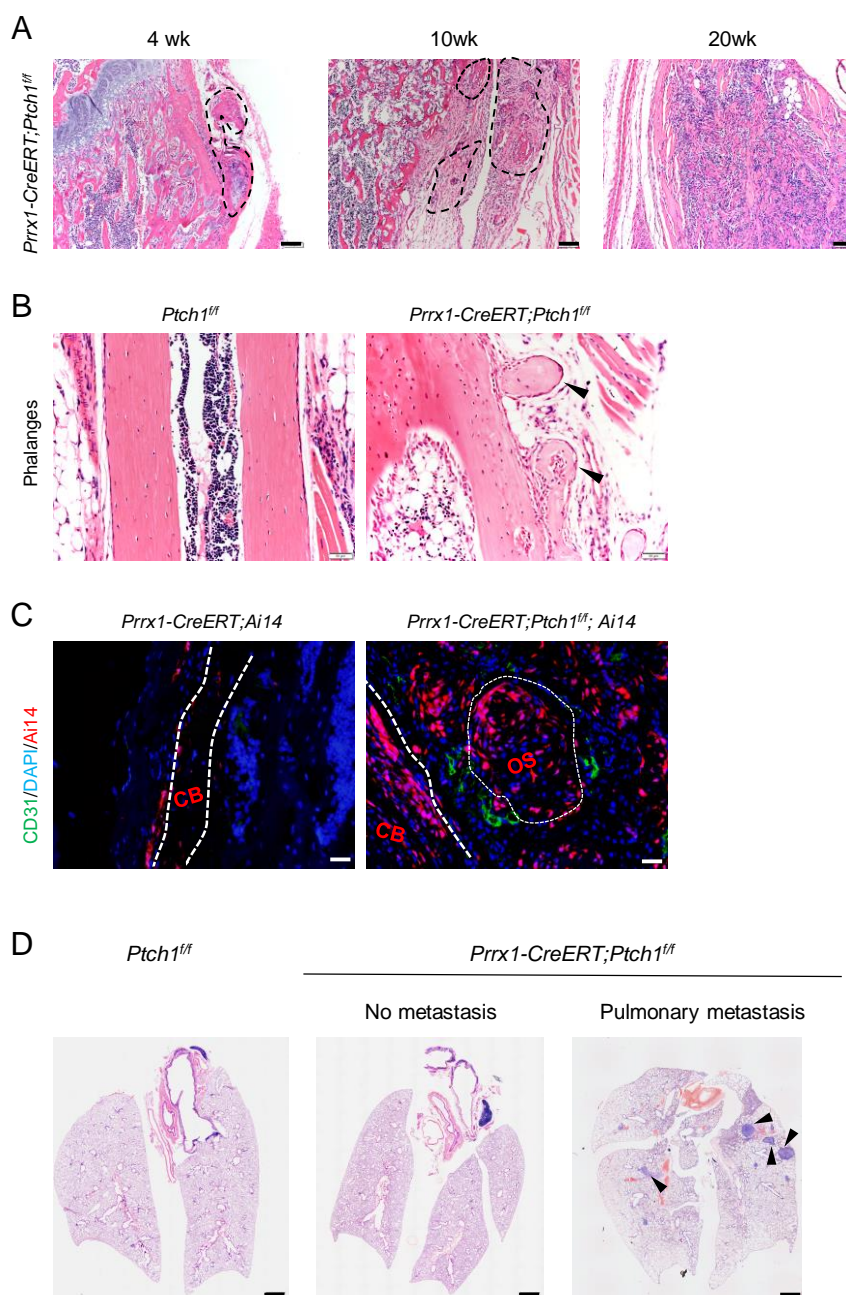

Figure 3-figure supplement 1

Supplement: supp [file elife_poa_e50208_Figure_3_figure_supplement_1.pdf › elife_poa_e50208_Figure_3_figure_supplement_1.pdf]

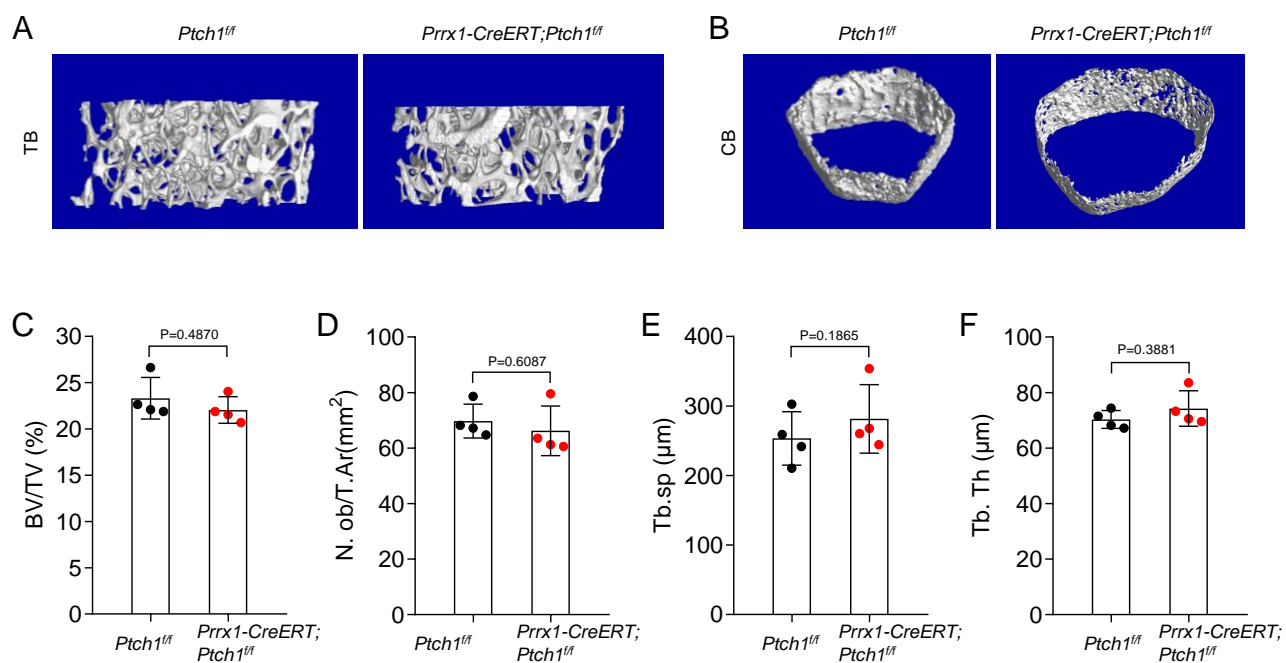

Figure 3-figure supplement 2

Supplement: supp [file elife_poa_e50208_Figure_3_figure_supplement_2.pdf › elife_poa_e50208_Figure_3_figure_supplement_2.pdf]

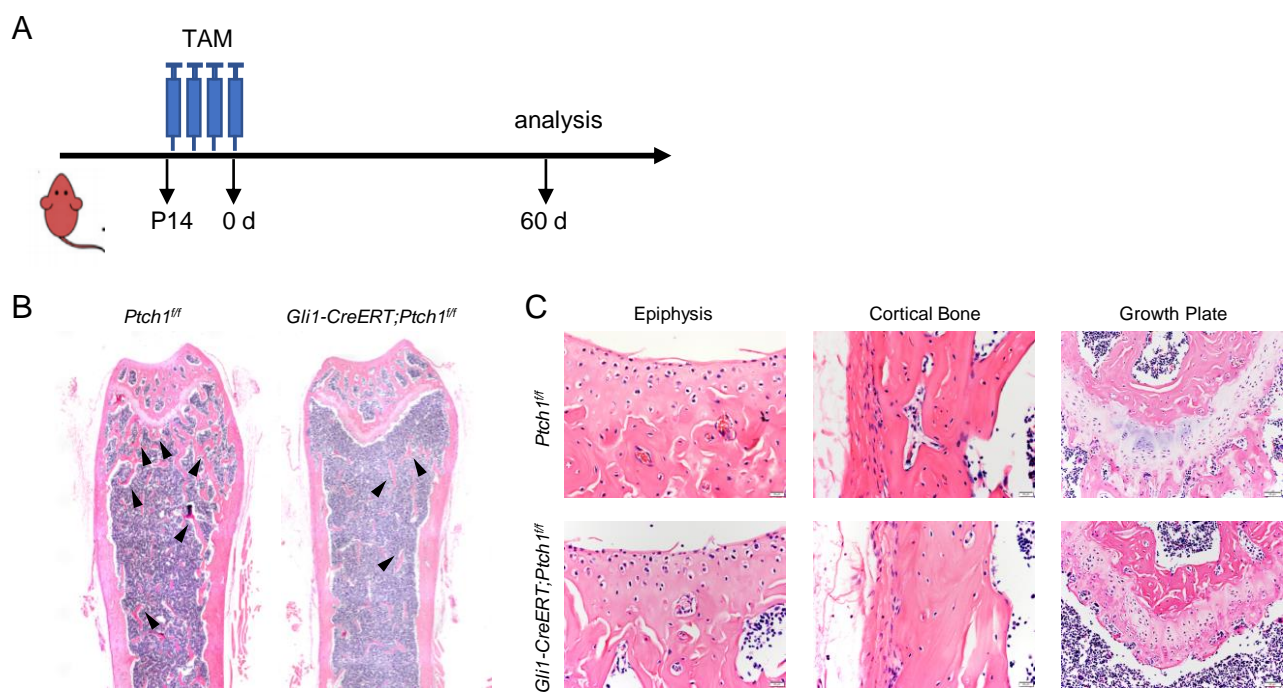

Figure 3-figure supplement 3

Supplement: supp [file elife_poa_e50208_Figure_3_figure_supplement_3.pdf › elife_poa_e50208_Figure_3_figure_supplement_3.pdf]

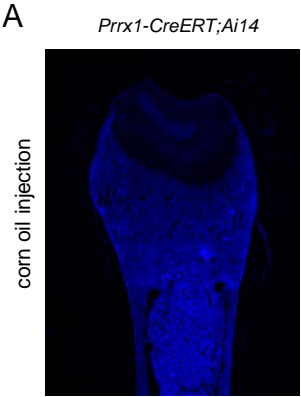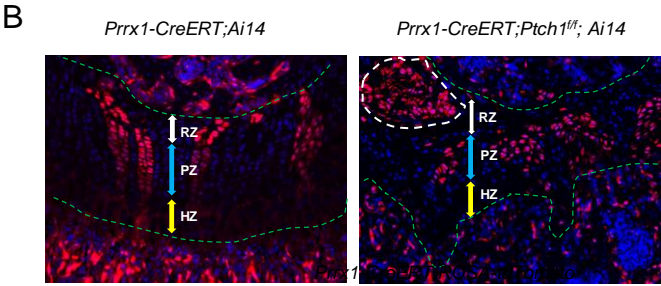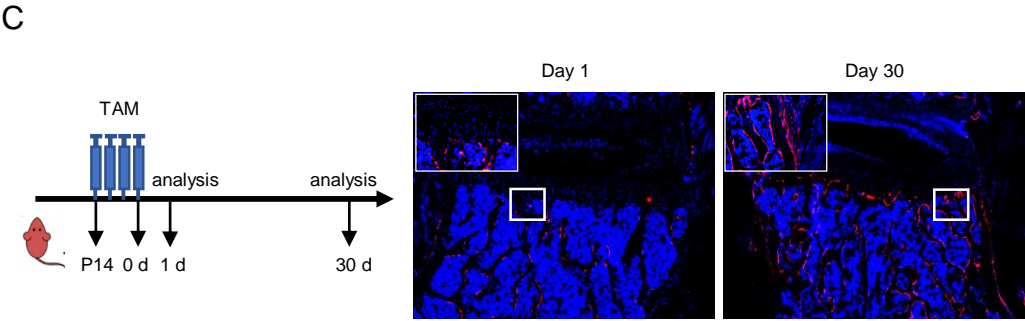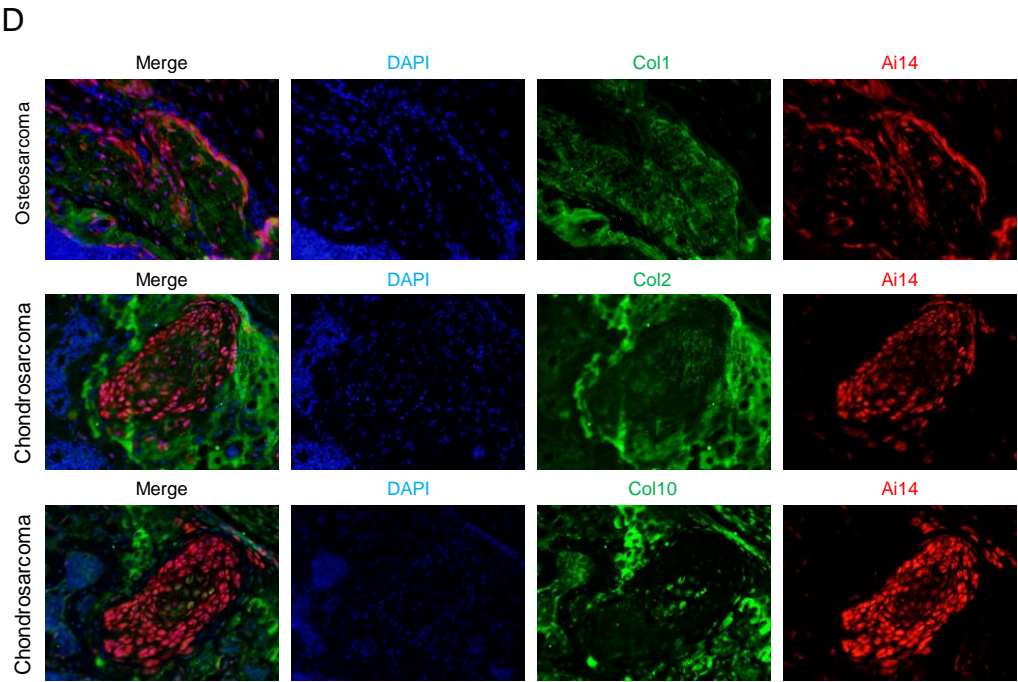

Figure 5-figure supplement 1

Supplement: supp [file elife_poa_e50208_Figure_5_figure_supplement_1.pdf › elife_poa_e50208_Figure_5_figure_supplement_1.pdf]

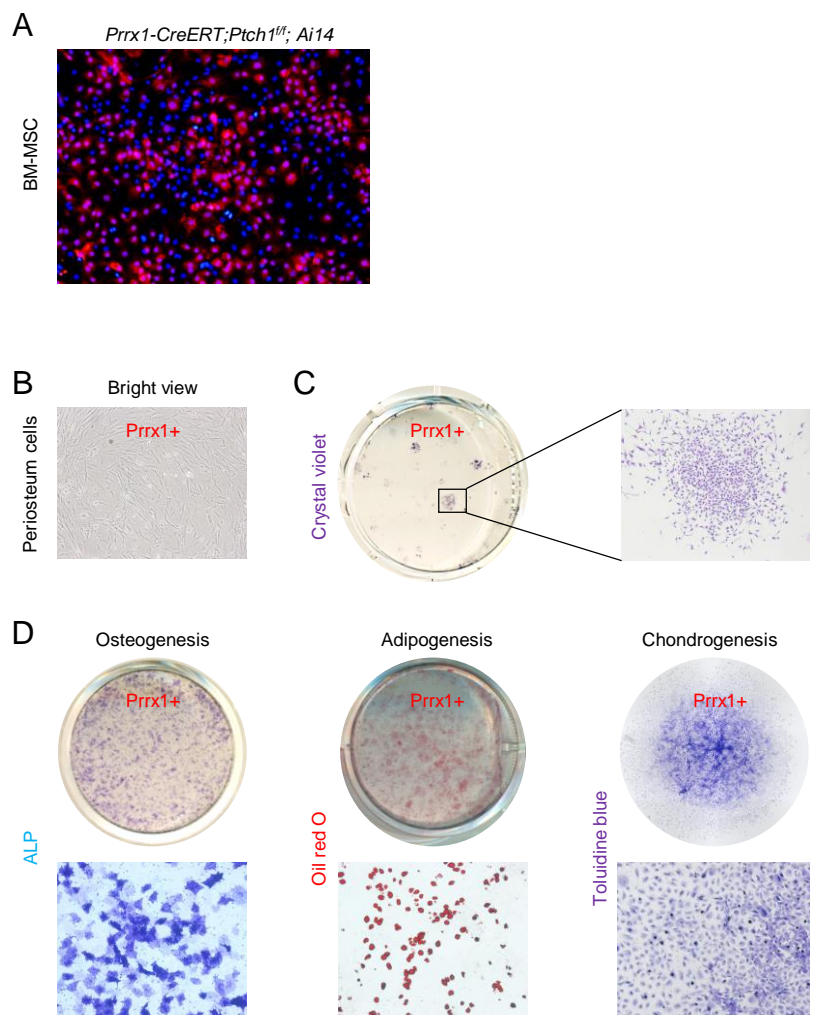

Figure 5-figure supplement 2

Supplement: supp [file elife_poa_e50208_Figure_5_figure_supplement_2.pdf › elife_poa_e50208_Figure_5_figure_supplement_2.pdf]

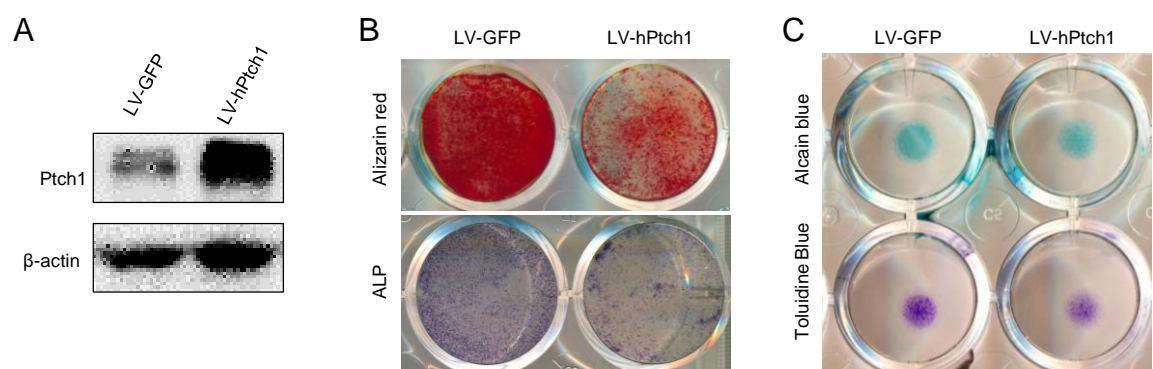

Figure 6-figure supplement 1

Supplement: supp [file elife_poa_e50208_Figure_6_figure_supplement_1.pdf › elife_poa_e50208_Figure_6_figure_supplement_1.pdf]

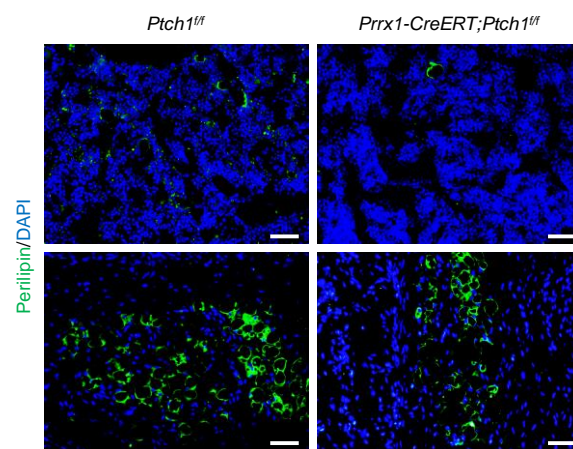

Figure 6-figure supplement 2

Supplement: supp [file elife_poa_e50208_Figure_6_figure_supplement_2.pdf › elife_poa_e50208_Figure_6_figure_supplement_2.pdf]

A

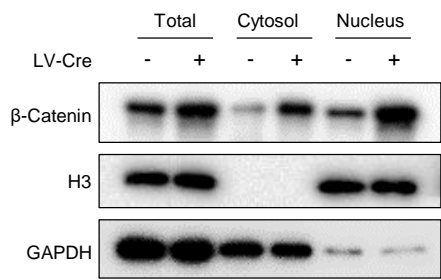

B

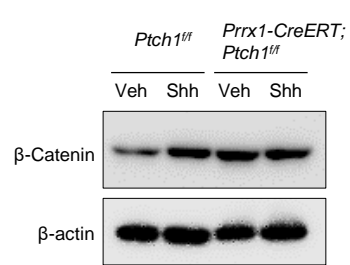

C

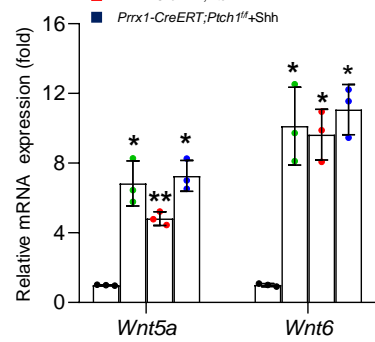

Figure 7-figure supplement 1

Supplement: supp [file elife_poa_e50208_Figure_7_figure_supplement_1.pdf › elife_poa_e50208_Figure_7_figure_supplement_1.pdf]

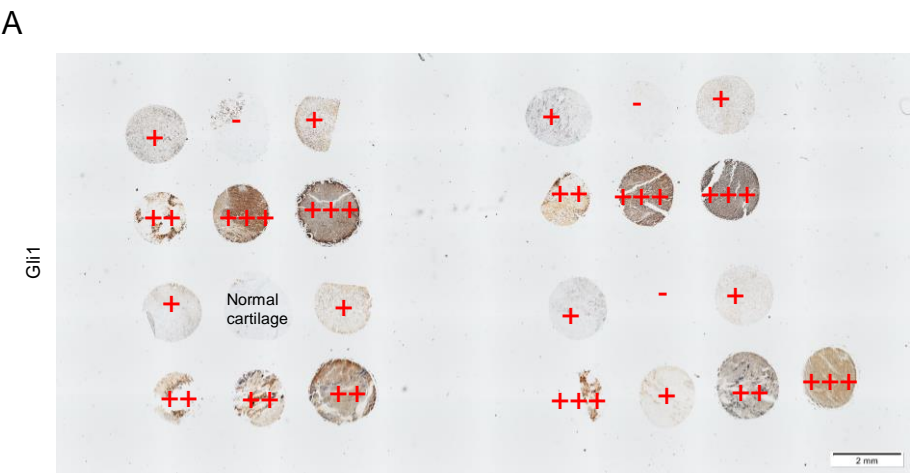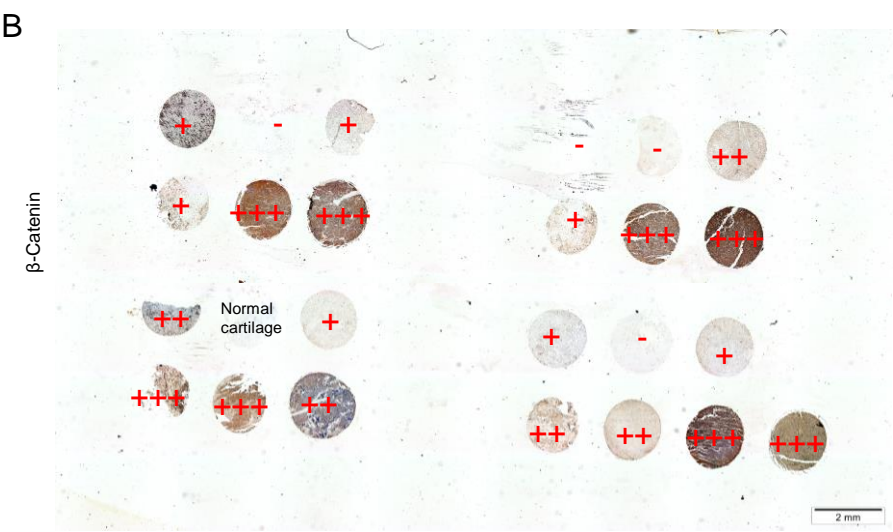

Figure 7-figure supplement 2

Supplement: supp [file elife_poa_e50208_Figure_7_figure_supplement_2.pdf › elife_poa_e50208_Figure_7_figure_supplement_2.pdf]

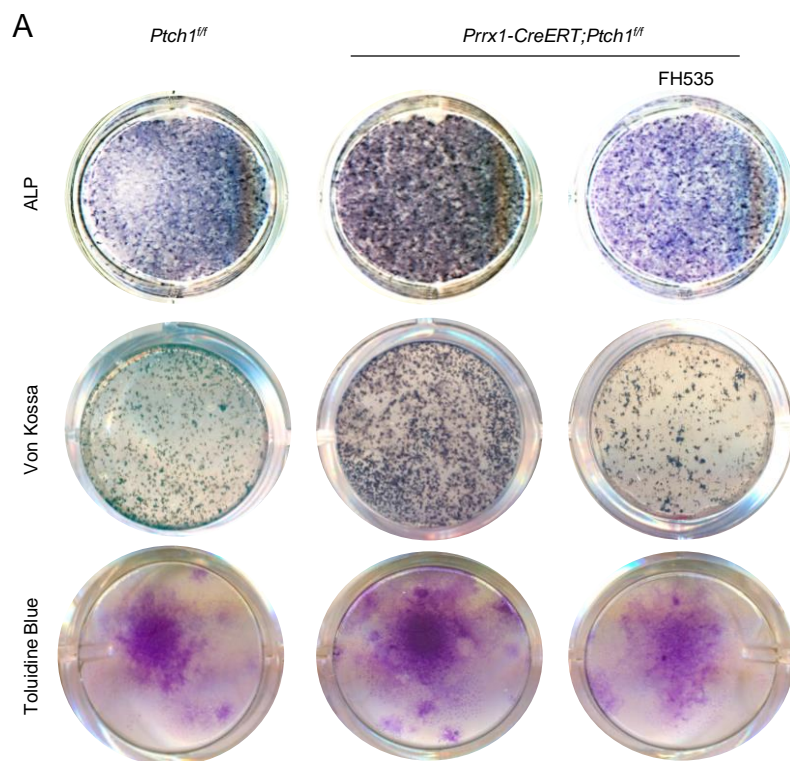

Figure 8-figure supplement 1

Supplement: supp [file elife_poa_e50208_Figure_8_figure_supplement_1.pdf › elife_poa_e50208_Figure_8_figure_supplement_1.pdf]

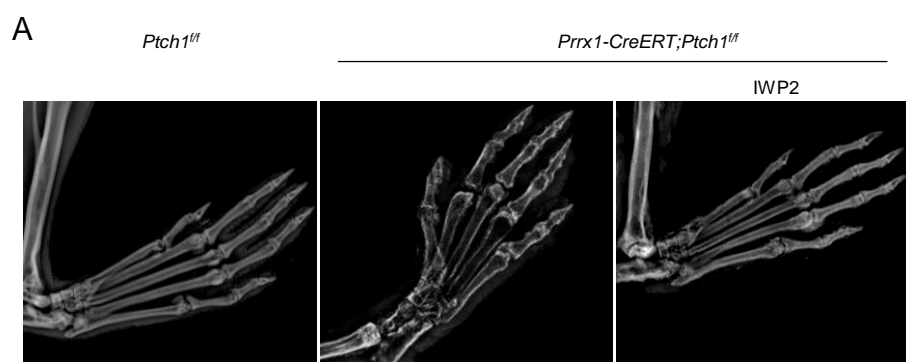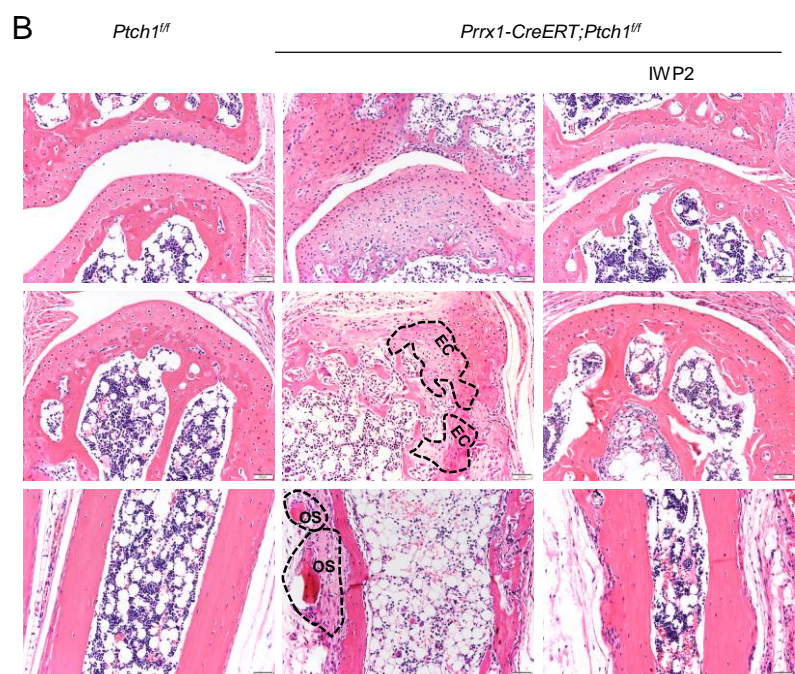

Figure 8-figure supplement 2

Supplement: supp [file elife_poa_e50208_Figure_8_figure_supplement_2.pdf › elife_poa_e50208_Figure_8_figure_supplement_2.pdf]
